# Supplementary material for: Aromatic L-amino Acid Decarboxylase (AADC) deficiency: results from an Italian modified Delphi consensus
Source: Springer Nature journal article supplement (doi:10.1186/s13052-021-00954-4), 2021-01-21
Supplement: MOESM1 [file 18787776]

Consensus Delphi

"AADCd Aromatic L-amino acid decarboxylase  
deficiency"

|                              |                                    |
|------------------------------|------------------------------------|
| Belcastro Vincenzo           | Nuovo Ospedale S. Anna di Como     |
| Capodiferro Donatella        | Ospedale SS. Annunziata di Taranto |
| Donati Maria Alice           | AOU Meyer di Firenze               |
| Gueraldi Daniela             | AOU di Padova                      |
| Manzoni Francesca            | AOU di Padova                      |
| Orsini Alessandro            | AOU di Pisa                        |
| Parisi Pasquale              | Ospedale Sant'Andrea di Roma       |
| Pisani Francesco             | Università degli Studi di Parma    |
| Sacchini Michele             | AOU Meyer di Firenze               |
| Spagnoli Carlotta            | ASMN di Reggio Emilia              |
| Spalice Alberto              | Università La Sapienza di Roma     |
| Verrotti di Pianella Alberto | Università degli Studi dell'Aquila |
| Viri Maurizio                | Ospedale Maggiore di Novara        |

## Statement 1. AADC clinical manifestations:

|                                                                                                                                                                     | 1   | 2 | 3    | 4 | 5 | TOT  |
|---------------------------------------------------------------------------------------------------------------------------------------------------------------------|-----|---|------|---|---|------|
| 1.1 There is high phenotypic variability, partly related to age at onset.                                                                                           | 0   | 0 | 7    | 6 | 0 | 13   |
|                                                                                                                                                                     | 0%  |   | 100% |   |   | 100% |
| 1.2 Predominating clinical manifestations at presentation in early-onset forms are autonomic, associated with hypotonia/movement disorder, and developmental delay. | 0   | 0 | 1    | 6 | 6 | 13   |
|                                                                                                                                                                     | 0%  |   | 100% |   |   | 100% |
| 1.3 There are significant differences in clinical characteristics between early-onset and adult-onset cases.                                                        |     | 2 | 3    | 5 | 3 | 13   |
|                                                                                                                                                                     | 15% |   | 85%  |   |   | 100% |
| 1.4 Regardless of clinical severity and phenotypic variability, onset symptoms are always present since the first year of age, although they can be mild.           |     | 1 | 5    | 5 | 2 | 13   |
|                                                                                                                                                                     | 8%  |   | 92%  |   |   | 100% |

## Statement 2. Clinical phenotypes:

|                                                                                                                                                                                                                                                   | 1  | 2 | 3    | 4 | 5 | TOT  |
|---------------------------------------------------------------------------------------------------------------------------------------------------------------------------------------------------------------------------------------------------|----|---|------|---|---|------|
| 2.1 It is necessary to raise awareness on underestimated symptoms, such as oculogyric crises, dystonia or dyskinesia.                                                                                                                             |    |   | 2    | 4 | 7 | 13   |
|                                                                                                                                                                                                                                                   | 0% |   | 100% |   |   | 100% |
| 2.2 The occurrence of hypoglycemic crises (non-diabetes-related) is not always recognized as a sign of metabolic dysfunction in AADC deficiency.                                                                                                  |    |   | 4    | 4 | 5 | 13   |
|                                                                                                                                                                                                                                                   | 0% |   | 100% |   |   | 100% |
| 2.3 The identification of common AADC symptoms associated with recognition of hypoglycemic crises and additional non-neurological symptoms (dyarrhea, gastro-oesophageal reflux, feeding difficulties, nasal congestion) enables early diagnosis. |    |   | 2    | 7 | 4 | 13   |
|                                                                                                                                                                                                                                                   | 0% |   | 100% |   |   | 100% |
| 2.4 In early-onset forms, presentation with epileptic encephalopathy is rare and does not represent a typical clinical feature.                                                                                                                   |    |   | 1    | 8 | 4 | 13   |
|                                                                                                                                                                                                                                                   | 0% |   | 100% |   |   | 100% |

## Statement 3. Diagnostic work-up:

|                                                                                                                                                                                                    | 1   | 2 | 3    | 4 | 5 | TOT  |
|----------------------------------------------------------------------------------------------------------------------------------------------------------------------------------------------------|-----|---|------|---|---|------|
| 3.1 1 The analysis of CSF neurotransmitters profile should represent the first diagnostic step.                                                                                                    |     | 1 | 1    | 6 | 5 | 13   |
|                                                                                                                                                                                                    | 8%  |   | 92%  |   |   | 100% |
| 3.2 In adult-onset forms with mild phenotype (for which diagnosis is even harder) whole exome sequencing should be considered in the diagnostic work-up.                                           |     |   | 4    | 5 | 4 | 13   |
|                                                                                                                                                                                                    | 0%  |   | 100% |   |   | 100% |
| 3.3 Based on the available evidence, venous 3-O-methyl-dopa (3OMD) levels represent a cheap, valid and readily available biomarker on which to base decision to begin diagnostic work-up for AADCd | 1   | 1 | 3    | 5 | 3 | 13   |
|                                                                                                                                                                                                    | 15% |   | 85%  |   |   | 100% |
| 3.4 Dosing plasma enzymatic AADC activity should be considered in cases with doubtful diagnosis if CSF neurotransmitters show non-significant abnormalities.                                       |     |   | 5    | 3 | 5 | 13   |
|                                                                                                                                                                                                    | 0%  |   | 100% |   |   | 100% |

## Statement 4. Regarding pharmacological and non-pharmacological therapies:

|                                                                                                                                                                                                                            | 1  | 2 | 3    | 4 | 5 | TOT  |
|----------------------------------------------------------------------------------------------------------------------------------------------------------------------------------------------------------------------------|----|---|------|---|---|------|
| 4.1 Dopamine agonists, MAO inhibitors, and vitamin B6 currently represent the first therapeutic choice in AADC patients.                                                                                                   |    |   | 1    | 4 | 8 | 13   |
|                                                                                                                                                                                                                            | 0% |   | 100% |   |   | 100% |
| 4.2 Anticholinergic drugs are commonly used for the symptomatic treatment of movement disorder. In some cases, for example status dystonicus or oculogyric crises, administration of benzodiazepines can become necessary. |    |   | 3    | 6 | 4 | 13   |
|                                                                                                                                                                                                                            | 0% |   | 100% |   |   | 100% |
| 4.3 The clinical management should be offered by a multi-disciplinary team (physical and occupational therapist, gastroenterologist, speech and language therapist, psychologist, clinical geneticist).                    |    |   | 2    | 3 | 8 | 13   |
|                                                                                                                                                                                                                            | 0% |   | 100% |   |   | 100% |
| 4.4 Early diagnosis is necessary in order to access gene therapy based on AAV vector, which is currently seeking approval by regulatory agencies.                                                                          |    |   | 2    | 4 | 7 | 13   |
|                                                                                                                                                                                                                            | 0% |   | 100% |   |   | 100% |

## Statement 5. Clinical network and support/advocacy groups:

|                                                                                                                                                                     | 1  | 2 | 3    | 4 | 5 | TOT  |
|---------------------------------------------------------------------------------------------------------------------------------------------------------------------|----|---|------|---|---|------|
| 5.1 Awareness on AADC deficiency should be spread by involving scientific societies operating in pediatrics, child neurology and neurometabolics.                   |    |   | 2    | 3 | 8 | 13   |
|                                                                                                                                                                     | 0% |   | 100% |   |   | 100% |
| 5.2 It is useful to increase awareness even outside clinical-scientific contexts by involving working groups dedicated to rare diseases in various Italian regions. |    |   | 3    | 2 | 8 | 13   |
|                                                                                                                                                                     | 0% |   | 100% |   |   | 100% |
| 5.3 Based on the low number of patients in Italy, it is necessary to develop a dedicated working group for AADCd.                                                   |    |   | 3    | 2 | 8 | 13   |
|                                                                                                                                                                     | 0% |   | 100% |   |   | 100% |
| 5.4 It is necessary to consider the opportunity to create a patients' association by means of a clinical network.                                                   |    | 1 | 3    | 2 | 7 | 13   |
|                                                                                                                                                                     | 8% |   | 92%  |   |   | 100% |

## Statement 6. Follow-up:

|                                                                                                                                                                                                                              | 1  | 2 | 3    | 4 | 5 | TOT  |
|------------------------------------------------------------------------------------------------------------------------------------------------------------------------------------------------------------------------------|----|---|------|---|---|------|
| 6.1 Cognitive and neuropsychological evaluation (appropriate for patient's age) should be performed by using standardized scales.                                                                                            |    |   | 2    | 4 | 7 | 13   |
|                                                                                                                                                                                                                              | 0% |   | 100% |   |   | 100% |
| 6.2 It is necessary to correctly characterize the associated movement disorder by means of standardized scales, according to patient's age (MD CRS 0-3; MD CRS 4-18R).                                                       |    |   | 2    | 4 | 7 | 13   |
|                                                                                                                                                                                                                              | 0% |   | 100% |   |   | 100% |
| 6.3 Standardized testing should be constantly applied during follow-up in order to evaluate treatment response, and cognitive and motor outcomes by using appropriate scales, as these data are lacking from the literature. |    |   | 2    | 4 | 7 | 13   |
|                                                                                                                                                                                                                              | 0% |   | 100% |   |   | 100% |
| 6.4 Improvements associated with cognitive and motor development and movement disorder severity after drug or gene therapy should be monitored by administering standardized scales.                                         |    |   | 2    | 3 | 8 | 13   |
|                                                                                                                                                                                                                              | 0% |   | 100% |   |   | 100% |
